# Supplementary material for: New strategies to Reduce Unnecessary Antibiotic Use in the NICU: A Quality Improvement Initiative
Source: PubMed Central journal article supplement — Pediatr Qual Saf. 2023 Jun 7;8(3):e659. doi: 10.1097/pq9.0000000000000659 (PMC10990351; doi:10.1097/pq9.0000000000000659), 2023-06-07
Supplement: pqs-8-e659-s001.pdf [file pqs-8-e659-s001.pdf]

**SDC Table 1: Positive Blood Cultures 2015-2019**

| Organism                                           | EOS | LOS |
|----------------------------------------------------|-----|-----|
| <i>Escherichia coli</i>                            | 7   | 10  |
| Group B streptococcus                              | 2   | 4   |
| <i>Enterococcus faecalis</i>                       | 2   | 0   |
| <i>Enterobacter cloacae</i>                        | 1   | 3   |
| <i>Listeria monocytogenes</i>                      | 1   | 0   |
| <i>Haemophilus influenzae</i>                      | 1   | 0   |
| <i>Streptococcus mitis</i>                         | 1   | 0   |
| <i>Staphylococcus epidermidis</i>                  | 0   | 4   |
| Methicillin-sensitive <i>Staphylococcus aureus</i> | 0   | 4   |
| Methicillin-resistant <i>Staphylococcus aureus</i> | 0   | 2   |
| <i>Klebsiella pneumoniae</i>                       | 0   | 1   |
| <i>Streptococcus lutetiensis</i>                   | 0   | 1   |
| <i>Serratia marcescens</i>                         | 0   | 1   |

Abbreviations. EOS, Early-Onset Sepsis. LOS, Late-Onset Sepsis
