# Supplementary material for: New strategies to Reduce Unnecessary Antibiotic Use in the NICU: A Quality Improvement Initiative
Source: PubMed Central journal article supplement — Pediatr Qual Saf. 2023 Jun 7;8(3):e659. doi: 10.1097/pq9.0000000000000659 (PMC10990351; doi:10.1097/pq9.0000000000000659), 2023-06-07
Supplement: pqs-8-e659-s002.pdf [file pqs-8-e659-s002.pdf]

**SDC Table 2:** Stepwise Logistic Regression for Late-Onset Sepsis

Number of observations = 2,629  
LR chi2(3) = 115.15 Prob > chi2 = 0.0000  
Pseudo R2 = 0.3418

Log likelihood = -110.89098

|                              | Odds ratio | Std. error | z     | P> z               | [95% conf. interval] |
|------------------------------|------------|------------|-------|--------------------|----------------------|
| Gestational Age <sup>a</sup> | .7484062   | .0921604   | -2.35 | 0.019 <sup>a</sup> | .5879205 .9527       |
| Birth Weight                 | .2602844   | .2232057   | -1.57 | 0.117              | .0484735 1.39763     |
| Year of Birth                | 1.084457   | .154527    | 0.57  | 0.569              | .8202056 1.433846    |
| _cons                        | 6.49e-69   | 1.87e-66   | -0.55 | 0.585              | 0 2.8e+176           |

Abbreviation: \_cons, estimates baseline odds or the height of the regression line when it crosses the Y axes.

Independent variables: Gestational Age, Birth Weight, and Year of Birth

<sup>a</sup> p<0.05
